1 **Title:** Differential effects of voclosporin and tacrolimus on insulin secretion from human islets

2

3 **Authors:** Jelena Kolic<sup>1</sup>, Leanne Beet<sup>1</sup>, Peter Overby<sup>1</sup>, Haoning Howard Cen<sup>1</sup>, Evgeniy  
4 Panzhinskiy<sup>1</sup>, Daren R. Ure<sup>2</sup>, Jennifer L. Cross<sup>3</sup>, Robert B. Huizinga<sup>3</sup>, James D. Johnson<sup>1\*</sup>

5

6 **Affiliations:**

7 <sup>1</sup> Diabetes Research Group, Life Sciences Institute, Department of Cellular and Physiological  
8 Sciences & Department of Surgery, University of British Columbia, Vancouver, Canada, V6T 1Z3.

9 <sup>2</sup> Hepion Pharmaceuticals, Edmonton, Alberta, Canada, T6N 1H1

10 <sup>3</sup> Aurinia Pharmaceuticals, Victoria, British Columbia, Canada, V8Z 7X8.

11

12 **\*Address correspondence to:** Professor James D. Johnson, PhD., Faculty of Medicine,  
13 Department Cellular and Physiological Sciences, The University of British Columbia, Life  
14 Sciences Institute, 5358 – 2350 Health Sciences Mall, Vancouver, British Columbia, Canada, V6T  
15 1Z3. Phone: 604 822 7187, Email: James.d.johnson@ubc.ca, Twitter: @JimJohnsonSci

16

17 **Short title:** Voclosporin versus Tacrolimus on Insulin Release

18 **Keywords:** immunosuppressant, insulin secretion, diabetes, organ transplantation

19

20 **Declaration of Interests:** JLC and RBH are employees of Aurinia Pharmaceuticals. JDJ has  
21 received research support to his lab to support this project. There are no other conflicts of interest  
22 to disclose.

23

24 **Funding:** Research was supported by a research contract from Aurinia Pharmaceuticals to J.D.J.

25

26

27 **Abstract**

28 **Context.** The incidence of new onset diabetes after transplant (NODAT) has increased over the  
29 past decade, likely due to calcineurin inhibitor-based immunosuppressants, including tacrolimus  
30 (TAC) and cyclosporin (CsA). Voclosporin (VCS), a next generation calcineurin inhibitor is  
31 reported to cause fewer incidences of NODAT but the reason is unclear.

32

33 **Objective.** Whilst calcineurin signaling plays important roles in pancreatic  $\beta$ -cell survival,  
34 proliferation, and function, its effects on human  $\beta$ -cells remain understudied. In particular, we do  
35 not understand why some calcineurin inhibitors have more profound effects on the incidence of  
36 NODAT.

37

38 **Methods.** We compared the effects of TAC and VCS on the dynamics of insulin secretory  
39 function, programmed cell death rate, and the transcriptomic profile of human islets. We studied  
40 two clinically relevant doses of TAC (10 ng/ml, 30 ng/ml) and VCS (20 ng/ml, 60 ng/ml), meant to  
41 approximate the clinical trough and peak concentrations.

42

43 **Results.** TAC, but not VCS, caused a significant impairment of 15 mM glucose-stimulated and  
44 30 mM KCl-stimulated insulin secretion. This points to molecular defects in the distal stages of  
45 exocytosis after voltage-gated  $\text{Ca}^{2+}$  entry. No significant effects on islet cell survival or total insulin  
46 content were identified. RNA sequencing showed that TAC significantly decreased the expression  
47 of 17 genes, including direct and indirect regulators of exocytosis (*SYT16*, *TBC1D30*, *PCK1*,  
48 *SMOC1*, *SYT5*, *PKD4*, and *CREM*), whereas VCS has less broad and milder effects on gene  
49 expression.

50

51 **Conclusions.** Clinically relevant doses of TAC, but not VCS, directly inhibit insulin secretion from  
52 human islets, likely via transcriptional control of exocytosis machinery.

53

54

## 55 Introduction

56 New onset diabetes after transplant (NODAT) is a clinical problem that has increased in  
57 incidence over the past decade. It is widely believed that NODAT is caused by exposure to  
58 steroids or high dose calcineurin inhibitors, including tacrolimus (TAC; also known as FK506) and  
59 cyclosporin (CsA) (1,2). These drugs are shown to damage cell types critical for the maintenance  
60 of glucose homeostasis, particularly pancreatic  $\beta$ -cells (3). TAC is a mainstay for prevention of  
61 transplant rejection, but effective immunosuppression targeting a concentration range of 4-11  
62 ng/mL still results in NODAT in > 20% of patients (1). There is an unmet clinical need for  
63 calcineurin inhibitors that do not cause diabetes in this already vulnerable patient population.

64 Voclosporin (VCS) is a next-generation calcineurin inhibitor that is structurally related to  
65 cyclosporine A (CsA) with the addition of a carbon molecule at amino acid-1 of CsA. This  
66 modification results in enhanced binding of the VCS-cyclophilin complex to calcineurin and shifts  
67 metabolism, resulting in increased potency and a consistently better pharmacokinetic-  
68 pharmacodynamic profile as compared to CsA. VCS was previously evaluated in a Phase IIb,  
69 multi-center, open-label, concentration-controlled study in patients undergoing *de novo* renal  
70 transplantation, evaluating the efficacy and safety of three doses of VCS (0.4, 0.6, and 0.8 mg/kg  
71 BID) as compared to TAC (4). In that study, the low-dose VCS group had similar efficacy to  
72 tacrolimus in controlling acute rejection with a significantly decreased incidence of NODAT (1.6%  
73 vs. 16.4%, respectively,  $p=0.031$ ) (4). In the AURA study for lupus nephritis, 1.1% of patients  
74 receiving VCS (23.7 mg) and 1.1% of patients in the placebo group reported diabetes (5),  
75 contrasting with NODAT in 25.7% of patients while taking a standard dose of TAC for 1 year (6).  
76 Thus, there is an unexplained difference between the clinical diabetes seen after treatment with  
77 VCS, and currently prescribed immunosuppressants, TAC and CsA.

78 While the etiology of NODAT is not well understood, calcineurin and nuclear factor of activated  
79 T-cells (NFAT) are involved in a number of cellular processes outside of immunosuppression,  
80 including direct roles in normal pancreatic  $\beta$ -cell development and physiology (7-9). For example,

81 Heit et al. reported that  $\beta$ -cell selective knockout of calcineurin in mice reduced functional  $\beta$ -cell  
82 mass and caused diabetes that could be rescued by over-expressing active NFATc1 (8). The  
83 effects of acute calcineurin inhibition on human and mouse islet function was previously  
84 investigated in a study by our group comparing clinically relevant concentrations of TAC, CsA,  
85 and rapamycin (7). *In vitro* experiments showed a direct decrease in  $\beta$ -cell function after only 24  
86 hours of exposure to TAC (7). *In vivo* studies in mice from our group and others have shown that  
87 inhibition of the calcineurin pathway by TAC impairs the function of transplanted human islet grafts  
88 (7,10). Thus, while previous data from animal models and human islets studies clearly  
89 demonstrates that TAC has multiple pathological effects on pancreatic islets, the mechanisms by  
90 which TAC impairs insulin secretion from human islets remained unresolved. Most importantly,  
91 there are no published studies directly comparing the direct effects of TAC versus VCS on human  
92 islets.

93 Here, we directly tested the hypothesis that VCS has lower human  $\beta$ -cell toxicity compared  
94 with TAC, and we conducted studies designed to investigate the molecular mechanisms involved  
95 (Fig 1A). We found that human islets exposed to TAC exhibited significantly reduced distal steps  
96 of glucose-stimulated insulin secretion, while VCS showed no statistically significant inhibition at  
97 a dose that elicits sufficient immunosuppression. RNA sequencing showed that TAC, and to a  
98 lesser extent VCS, decreased the expression of genes that specifically regulate the distal steps  
99 of insulin secretion. In support of the clinical observations, our data suggest that VCS is less toxic  
100 to human pancreatic  $\beta$ -cells at clinically relevant doses.

101

## 102 **Methods**

### 103 *Human islet culture*

104 High-quality research specific human islets from cadaveric donors were obtained from  
105 IsletCore Laboratory in Edmonton Alberta (11), and used under ethical approval from the UBC

106 Clinical Research Ethics Board (H13-01865). Islets were shipped in CMRL media (Thermo Fisher  
107 Scientific) overnight from Edmonton to the University of British Columbia. Upon arrival, islets were  
108 immediately purified by handpicking under a stereomicroscope and suspended in RPMI 1640  
109 medium (Thermo Fisher Scientific) supplemented with 5.5 mmol glucose, 10% FBS, and 100  
110 units/ml penicillin/streptomycin. Groups of 100 islets were placed in non-treated 100-mm  
111 polystyrene petri dishes (Fisher Scientific) followed by 48-hr incubation at 37°C and 5% CO<sub>2</sub> (Fig.  
112 1A). We chose 48-hr as an incubation time to balance our efforts to model long-term (years)  
113 exposure to these drugs in the clinical setting with our experience that human islet function  
114 degrades after 4-5 days in culture. Donor and isolation characteristics can be found in Figure 1B.

115

#### 116 *Immunosuppression-related assays*

117 The Calcineurin inhibitor assay and the T-cell proliferation assay are described in more detail  
118 elsewhere (12,13). Briefly, peripheral blood mononuclear cell (PBMC) lysates were used in the  
119 calcineurin assay after 25 min stimulation with PMA-A23187. After lysis with a calcineurin assay  
120 buffer (no detergents) and 3 freeze-thaw cycles, the soluble fraction was probed by Western blot  
121 with 1:200 anti-NFAT2 antibody (Santa Cruz Biotechnology Cat# sc-13033, RRID:AB\_2152501).  
122 Western blot analysis of NFAT accumulation after treatment with indicated doses of VCS and  
123 TAC was then conducted to identify the relative concentrations that elicited a similar response.

124

#### 125 *Dynamic analysis of insulin secretion from human islets*

126 To define the dynamic effects of VCS and TAC on insulin secretion from human islets, we used  
127 human islet perfusion studies (7). We assessed the effects of TAC (10 ng/ml, 30 ng/ml) and VCS  
128 (20 ng/ml, 60 ng/ml) on the dynamics of insulin secretion in response to two stimuli that are  
129 diagnostic of changes in metabolism/signalling or exocytosis. Our standard approach (7,14-19)  
130 compared the response to 15 mM glucose stimulation and direct depolarization with 30 mM KCl.  
131 More specifically, 65 islets per column were perfused (0.4 ml/min) with 3 mM glucose KRB

132 solution as described previously (7) for 60 min to equilibrate the islets to the KRB and flow rate,  
133 and then with the indicated condition (as described in corresponding figure legends). First phase  
134 insulin release was defined as the amount of insulin secreted during the first 20 min of 15 mM  
135 glucose stimulation, while the remaining 40 of stimulation were defined as second phase. DMSO,  
136 VCS and TAC were present at the indicated concentrations during the entirety of the perfusion  
137 experiment. We repeated this experiment on islets from 17 donors to take into account the  
138 significant variability between human islet preparations (11). Samples were stored at  $-20^{\circ}\text{C}$  and  
139 insulin secretion was quantified using human insulin radioimmunoassay kits (Cedarlane).

140

#### 141 *Cell death assays*

142 Pancreatic islets from human cadaveric donors were dispersed and seeded into 384-well  
143 plates and cultured in similar manner as previously described (20-23). Cells were stained with 50  
144 ng/mL Hoechst 33342 (Invitrogen) and 0.5  $\mu\text{g}/\text{mL}$  propidium iodide (PI) (Sigma-Aldrich) in RPMI  
145 1640 medium (Invitrogen) with 5 mM glucose (Sigma-Aldrich), 100 U/mL penicillin, 100  $\mu\text{g}/\text{mL}$   
146 streptomycin (Invitrogen), 10% vol/vol fetal bovine serum (FBS) (Invitrogen) with or without a  
147 cytokine cocktail (25 ng/mL TNF- $\alpha$ , 10 ng/mL IL-1 $\beta$ , and 10 ng/mL IFN- $\gamma$ ; R&D Systems). We  
148 have previously shown that neither of these chemicals affect islet cell viability on their own at  
149 these concentrations (23). After 2 hours of staining, cells were incubated with different  
150 concentrations of VCS or TAC (1, 10, 20, 30, 60, 120 ng/ml) or vehicle (DMSO) and with a  
151 cytokine cocktail (25 ng/mL TNF- $\alpha$ , 10 ng/mL IL-1 $\beta$ , and 10 ng/mL IFN- $\gamma$ ; R&D Systems).  
152 Immediately after the addition of the test drugs, the cells were imaged at  $37^{\circ}\text{C}$  and 5%  $\text{CO}_2$ .  
153 Images were captured every second hour for 48 hours using a robotic microscope  
154 (ImageXpress<sup>MICRO</sup> XLS, Molecular Devices) and analyzed using MetaXpress multi-wave cell  
155 score Software (Molecular Devices). To adjust for the difference in basal cell death for each  
156 individual run, each timepoint was normalized to the first timepoint then further normalized to the  
157 cytokine control.

158 *RNA-sequencing and pathway analysis*

159 Groups of 200 islets from 7 independent donors were treated for 48 hours with vehicle (DMSO),  
160 TAC (30 ng/ml) or VCS (60 ng/ml) then immediately flash-frozen in liquid nitrogen and stored at -  
161 80°C. RNA isolation, library preparation, RNA sequencing and bioinformatics support were  
162 provided by the UBC Biomedical Research Centre Core Facility. Briefly, sample quality control  
163 was performed using the Agilent 2100 Bioanalyzer. Qualifying samples were then prepped  
164 following the standard protocol for the NEBnext Ultra ii Stranded mRNA (New England Biolabs).  
165 Sequencing was performed on the Illumina NextSeq 500 with Paired End 42bp × 42bp reads. De-  
166 multiplexed read sequences were then aligned to the reference sequence using STAR aligners  
167 (STAR, RRID:SCR\_015899) Assembly were estimated using Cufflinks (Cufflinks,  
168 RRID:SCR\_014597) through bioinformatics apps available on Illumina Sequence Hub. Raw  
169 counts were analyzed by NetworkAnalyst 3.0 ([www.networkanalyst.ca](http://www.networkanalyst.ca)) (24). DeSeq package was  
170 selected for differential expression of the genes. Differentially expressed genes were identified as  
171 those with an adjusted  $p$  value < 0.05 using the comparison of TAC vs DMSO or VCS vs DMSO.

172 To determine the relationship between the differentially expressed genes and the calcineurin-  
173 NFAT pathway, we extracted all 49 genes in the Gene Ontology Term “calcineurin-NFAT  
174 pathway” (accessed July 30, 2020 from  
175 [http://www.informatics.jax.org/vocab/gene\\_ontology/GO:0033173](http://www.informatics.jax.org/vocab/gene_ontology/GO:0033173)). We removed genes from the  
176 calcineurin-NFAT list without human homologues and that were not expressed in our human islet  
177 RNAseq. We then combined the expressed calcineurin-NFAT list with the genes that were  
178 differentially expressed between DMSO and TAC and used the protein-protein network interaction  
179 analysis tools at [string-db.org](http://string-db.org) with the following setting (active interaction sources – all; medium  
180 confidence 0.4; max interactors 0).

181 *Statistics and data analysis*

182 Data were analyzed using a one-way multiple comparisons ANOVA followed by a *post hoc* t-  
183 test using the Tukey HSD method, unless otherwise indicated. Data are expressed as means ±

184 SEM, and  $p < 0.05$  was considered significant. n values represent the number of unique islet  
185 donors studied.

186

## 187 **Results**

### 188 *Effects of TAC and VCS on NFAT activity*

189 Both TAC and VCS exert their immunosuppressive effects through inhibition of calcineurin  
190 phosphatase activity, preventing the dephosphorylation and activation of NFATc (25,26). Each of  
191 these two drugs is distinct with regard to its molecular mechanism of action. TAC interacts with  
192 the immunophilin FKBP12 prior to binding calcineurin, whereas VCS interacts with cyclophilins.  
193 The *in vitro* activity of TAC, VCS (and the structurally related inhibitor CsA) were compared in a  
194 calcineurin inhibition assay and for their downstream ability to inhibit the division of activated T  
195 cells. The  $IC_{50}$  of TAC against calcineurin was found to be approximately 4-fold lower than VCS,  
196 in accordance with clinical dosing where the therapeutic range of TAC is 5-30 ng/mL and VCS  
197 target trough concentrations are around 20-60 ng/mL (Fig 2A). Surprisingly, the potency  
198 difference between TAC and VCS widened to 50-fold, in favor of TAC, when looking at inhibition  
199 of T-cell proliferation (Fig 2A), leading to additional experiments comparing the impact of each  
200 drug on their common pathway effector, NFAT. Maximal activation of NFAT was observed at 56  
201 ng/mL of VCS and only 1.4 ng/mL of TAC, a potency difference of 40-fold (Fig. 2B,C,D). These  
202 data demonstrate that, at therapeutic concentrations, TAC has a far more profound impact on  
203 NFAT than VCS (Fig. 2E).

204

### 205 *Effects of TAC or VCS on basal and glucose stimulated insulin secretion*

206 Insulin is released from pancreatic islets, *in vivo* and *in vitro*, in a biphasic pattern that includes  
207 both a rapid 1<sup>st</sup> phase of pre-docked insulin granules and a 2<sup>nd</sup> sustained phase involving granules  
208 that are recruited to the plasma membrane (27). There is significant inter-individual variability in  
209 the rate of insulin secretion from human islets (11) and the effects of immunosuppressants (7),



210 so we examined insulin secretion from high quality human islets isolated from 17 donors  
211 exclusively for research purposes. We employed the dynamic perfusion system with frequent  
212 sampling to evaluate basal insulin secretion at 3 mM glucose, both phases of insulin secretion  
213 during 15 mM glucose stimulation, and insulin secretion in response to direct depolarization with  
214 30 mM KCl. TAC at 10 ng/ml (clinical trough) and 20 ng/ml (clinical peak) significantly inhibited  
215 total insulin secretion at 15 mM glucose, whereas VCS did not (Fig. 3A,B). TAC exhibited a  
216 specific effect on the 2<sup>nd</sup> phase but not the 1<sup>st</sup> phase of glucose-stimulated insulin secretion (Fig.  
217 3C,D). The insulin secretory response to 30 mM KCl was also significantly inhibited by both  
218 concentrations of TAC (Fig. 3E). In contrast, VCS concentrations approximately 2 times higher  
219 than TAC had milder effects on glucose-stimulated insulin secretion. Specifically, the clinical  
220 trough concentration of 20 ng/ml VCS was ~50% less inhibitory to the total and 2<sup>nd</sup> phase of insulin  
221 secretion and did not result in statistically significant inhibition (Fig. 3A,B,D). No significant  
222 differences in basal insulin secretion were observed at 3 mM glucose for either drug at either of  
223 the concentrations tested (Fig. 3F). Similar results were observed when the perfusion data were  
224 normalized to basal insulin secretion (Fig. 3G,H). We were unable to detect significant differences  
225 in acid-ethanol extractable insulin protein content in human islets treated with either drug, at either  
226 concentration, for 48 hr (Fig. 4). These results indicate that the specific significant inhibitory effects  
227 of TAC on total and 2<sup>nd</sup> phase glucose-stimulated insulin secretion, as well as insulin secretion  
228 stimulated by direct depolarization, are likely to be direct effects on the exocytosis machinery  
229 rather than a result of reduced insulin production. Collectively, these data also demonstrate that  
230 VCS has milder effects on human islet secretory function when compared with TAC in this  
231 sensitive *in vitro* assay system.

232

### 233 *Effects of TAC or VCS on human islet cell survival*

234 We next assessed the effects of TAC and VCS on the survival of dispersed human islet cells  
235 using our long-term high-content imaging protocols that measure both apoptotic and non-

236 apoptotic cell death over multiple days of culture in the presence of proinflammatory cytokines  
237 (20-23) (Fig. 5A,B). We studied both TAC and VCS over a 5 point-dose response curve. We  
238 observed no significant differences in human islet cell survival following either drug treatment (Fig.  
239 5C). This is consistent with our data showing no changes in insulin content following 48 hrs of  
240 drug treatment, further pointing to the primacy of the direct effect of TAC on insulin secretion.

241

#### 242 *Effects of TAC or VCS on human islet gene expression*

243 In order to provide clues as to the underlying molecular mechanisms by which TAC, but not  
244 VCS, significantly inhibits insulin secretion we performed RNAseq and network analysis on human  
245 islets from 7 donors (Fig 1B). Despite significant donor to donor variation in gene expression, we  
246 were able to identify multiple significantly differentially expressed genes in human islets treated  
247 with these immunosuppressant drugs, compared to DMSO (Fig. 6A). Specifically, TAC  
248 significantly decreased the expression of synaptotagmin 16 (*SYT16*), TBC1 domain family  
249 member 30 (*TBC1D30*), phosphoenolpyruvate carboxykinase 1 (*PCK1*), SPARC related modular  
250 calcium binding 1 (*SMOC1*), synaptotagmin 5 (*SYT5*), muscular LMNA interacting protein (*MLIP*),  
251 coiled-coil domain containing 184 (*CCDC184*), ankyrin repeat and SOCS box containing 4  
252 (*ASB4*), pyruvate dehydrogenase kinase 4 (*PDK4*), long intergenic non-protein coding RNA 473  
253 (*LINC00473*), long intergenic non-protein coding RNA 602 (*LINC00602*), SLC8A1 antisense RNA  
254 1 (*SLC8A1-AS1*), leucine rich repeat LGI family member 2 (*LGI2*), islet amyloid polypeptide  
255 (*IAPP*), cAMP responsive element modulator (*CREM*), B9 domain containing 1 (*B9D1*), and  
256 scavenger receptor class B member 2 (*SCARB2*). VCS only significantly decreased the  
257 expression of *SYT16*, *TBC1D30*, and *PCK1*, and to a qualitatively lesser degree.

258 Next, we examined the relationship between the calcineurin-NFAT gene network, as defined  
259 by its Gene Ontology term, and the TAC-modulated genes in human islets using single String  
260 protein-protein interaction network modelling (Fig. 6B). These analyses showed that CREM was  
261 the TAC-target mostly highly connected to calcineurin-NFAT network, with highest confidence-

262 level interactions with NFATC1, NFATC2, and NFATC3, and a medium confidence link to GSK3B.  
263 MILP showed high confidence interactions with a module including Cardiomyopathy Associated  
264 5 (CMYA5) and Myozenin 2 (MYOZ2). PCK1 showed a medium confidence interaction with  
265 GSK3B. PDK4 showed a high confidence interaction with MTOR, and also with PCK1.

266 We found medium confidence interactions between SMOC1 and Leucine Rich Repeat LGI  
267 Family Member 2 (LGI2), between B9D1 and Mitogen-Activated Protein Kinase 7 (MAPK7), and  
268 between IAPP and Prion Protein (PRNP). Together, these analyses show how VCS and TAC  
269 treatment affect the expression of specific genes via calcineurin signalling and lead us to our  
270 current working model (Fig. 7C).

271

## 272 **Discussion**

273 The effects of calcineurin inhibitors on human  $\beta$ -cells remain understudied. A deeper  
274 understanding of how immunosuppressive agents affect human islets is necessary to elucidate  
275 the pathogenesis of NODAT and to identify immunosuppressants with improved safety profiles.  
276 Thus, the objective of the present study was to determine why the next-generation calcineurin  
277 inhibitor, VCS, has lower human  $\beta$ -cell toxicity compared with TAC. To examine this, we compared  
278 the effects of TAC and VCS on the dynamics of insulin secretory function, the programmed cell  
279 death, and the transcriptomic profile of isolated human islets. We found that TAC, but not VCS,  
280 caused a significant impairment of both 15 mM glucose and 30 mM KCl-stimulated insulin  
281 secretion at clinically relevant doses. We saw no effect on total insulin content or human islet cell  
282 survival with either drug. Gene pathway enrichment analysis of RNAseq data showed that TAC  
283 decreased the expression of genes that regulate exocytosis and genes that regulate transport  
284 from the ER to the Golgi apparatus. VCS treatment also induced these changes; however, it did  
285 so to a lesser extent. Thus, this greater inhibition of insulin secretion could provide an explanation  
286 of why the risk of NODAT is higher in patients taking TAC than the next generation calcineurin

287 inhibitor VCS. The equivalently immunosuppressive dose ranges of VCS and TAC we used have  
288 dramatically different potencies on NFAT, suggesting that NFAT-mediated gene expression  
289 mediates the observed effects on exocytosis regulating gene expression.

290 Previous studies have found that calcineurin inhibitors impair glucose-stimulated insulin  
291 secretion in rodent islets and rodent cell lines (8,28-39), although through mechanisms that we  
292 show here are not validated in human islets. For example, we do not see evidence for a robust  
293 effect of TAC or VCS on insulin production or gene expression. Moreover, the majority of rodent  
294 studies (8,28-39) and previous studies using human islets (7,10,40-47) used concentrations of  
295 calcineurin inhibitors that are higher than seen clinically. Our study extends these previous  
296 findings by using clinically relevant doses of TAC and VCS, rigorously examining the kinetics of  
297 insulin release in human islets and by implicating a direct effect on insulin granule trafficking. TAC  
298 at 10 ng/ml (clinical trough) and 20 ng/ml (clinical peak) significantly inhibited total insulin  
299 secretion in response to 15 mM glucose and this inhibition was directly due to a specific effect on  
300 the 2<sup>nd</sup> phase of insulin release. Furthermore, KCl-stimulated insulin secretion was decreased to  
301 a similar degree, implicating secretory pathways distal to Ca<sup>2+</sup> entry via voltage-gated Ca<sup>2+</sup>  
302 channels. Together, these data suggest that the readily releasable pool of insulin granules is not  
303 robustly affected by TAC-mediated calcineurin inhibition; instead, TAC most likely impairs  
304 pathways associated with insulin granule trafficking to the plasma membrane. While we did not  
305 directly look at exocytotic events in this study, the results of our RNAseq analysis are consistent  
306 with a TAC-mediated effect on insulin granule traffic and release. TAC has previously been  
307 suggested to impair glucose-stimulated insulin secretion in rat islets via a mechanism involving  
308 insulin granule exocytosis (39). Future studies using electrophysiology and imaging to examine  
309 insulin granule docking, priming and release will provide a more detailed biophysical explanation  
310 of TAC effects in human  $\beta$ -cells.

311 Our RNAseq data provided novel insights into the molecular mechanisms controlling insulin  
312 secretion from human  $\beta$ -cells, the effects of these drugs, and impetus for follow-up studies on

313 several gene products. A prime candidate is SYT16, which has not previously been directly  
314 implicated in glucose-stimulated insulin secretion but that is known to be glucose responsive in  
315 human islets (48) and under circadian control in mouse islets (49). The causal role of SYT5 in  
316 insulin secretion remains unclear in primary human  $\beta$ -cells (50), but should also be investigated  
317 further. TAC likely also has direct effects on insulin granule trafficking given that TBC1D30 is an  
318 activating GTPase of RAB3 (51). MLIP activates AKT, which can promote insulin secretion (52),  
319 and is regulated by CREB/CREM transcription factors. Indeed, TAC significantly inhibited CREM,  
320 a member of the CREB family of transcription factors known as master regulators of  $\beta$ -cell function  
321 (53). Previous studies in a  $\beta$ -cell line have shown that TAC inhibits CREB transcriptional activity  
322 (54). *B9D1* contributes to the biogenesis of the primary cilium, which is required for normal insulin  
323 secretion (55). *PCK1* and *PDK4* regulate cellular metabolism, but require additional studies in  
324 human islets. TAC reduced *IAPP* expression but the functional consequence of this is unclear.  
325 Thus, the majority of significantly downregulated genes point to the distal stages of insulin  
326 trafficking and exocytosis as the primary sites of TAC-induced  $\beta$ -cell dysfunction. We used  
327 protein-protein interaction mapping to predict the most likely link(s) between calcineurin signaling  
328 and the TAC-downregulated genes. Indeed, this network analysis suggested direct and robust  
329 links to CREM in TAC-treated human islets. Collectively, these data further solidify the role of  
330 calcineurin signaling and NFAT-mediated gene transcription in human  $\beta$ -cell function and provide  
331 insight into the molecular mechanisms controlling 2<sup>nd</sup> phase insulin exocytosis.

332 Calcineurin activity has been ascribed a number of functions in pancreatic  $\beta$ -cells (8-10,41,56-  
333 59). For example, cultured insulinoma cells treated with the calcineurin inhibitor  
334 cypermethrin exhibited decreased insulin exocytosis in response to both glucose and KCl  
335 stimulation (60). In contrast to this, some studies suggest that calcineurin has a negative role in  
336 insulin exocytosis. However, these were indirect findings obtained by examining the inhibition of  
337  $\beta$ -cell exocytosis via neurotransmitter-mediated activation of calcineurin (61,62), as opposed to

338 direct effects observed following inhibition of calcineurin. Nevertheless, our study now shows that  
339 VCS is gentler on human islets because it does not cause the same level of inhibition on insulin  
340 exocytosis compared to TAC.

341 In our previous work, we examined the different effects of immunosuppressive drugs (TAC,  
342 cyclosporine, and rapamycin) on induced endoplasmic reticulum (ER) stress and caspase-3-  
343 dependent apoptosis in human islets (7). In that study, we found that TAC impaired glucose-  
344 stimulated insulin release from human islets, but did not significantly elevate the protein levels of  
345 CHOP or cleaved caspase-3, indicating that its effects were mostly on  $\beta$ -cell function rather than  
346 fate (7). In our current study we measured human islet cell survival over a longer period by using  
347 our high-content imaging protocol. We found that neither TAC nor VCS had significant deleterious  
348 effect on islet cell survival or insulin content over 48 hours, under the current testing conditions.  
349 Similarly, our post RNA-seq pathway analysis did not identify significant changes in genes  
350 involved in  $\beta$ -cell apoptosis and/or survival. While an increase in  $\beta$ -cell ER-stress and apoptosis  
351 is a plausible pathophysiological mechanism for the diabetic effects of immunosuppressants in  
352 the post-transplant clinical setting, it is unlikely that this is the mechanism explaining why the risk  
353 of NODAT is higher in patients taking TAC when compared with VCS.

354 Limitations of our study include the following. Although we had the benefit of directly examining  
355 human islets, our *in vitro* experiments may be impacted by islet isolation and culture.  
356 Nevertheless, the fundamental *in vivo* mechanisms appear to be well conserved in high quality  
357 isolated islets such as those used in our study (11). Mechanistically, our analysis of insulin  
358 secretion in response to high glucose and high KCl, together with the transcriptomic profiling,  
359 points to direct effects on the distal processes of insulin exocytosis. Future studies could directly  
360 measure exocytosis with electrophysiological capacitance measurements. Our data point to  
361 differences in NFAT activation between VCS and TAC than can explain the distinct impacts on  
362 insulin secretion, but our work employed non- $\beta$ -cells for the dose-finding experiment and ideally

363 future studies will be repeated in human  $\beta$ -cells or human  $\beta$ -cell lines. We chose the  
364 concentrations for our *in vitro* studies based on clinical efficacy. The observation that lower  
365 concentrations of TAC were more toxic than VCS favours this next generation  
366 immunosuppressant. Given the clinical importance of calcineurin inhibitor mediated  $\beta$ -cell  
367 dysfunction, we hope that our work stimulates more experimentation in human islets and other  
368 key tissue governing glucose homeostasis.

369 In summary, we have demonstrated that TAC, but not VCS, significantly inhibits the total  
370 response of glucose-stimulated insulin secretion from human islets. This decrease in secretion is  
371 not mediated by effects on islet cell health or insulin content and is most likely a direct  
372 consequence of decreased insulin granule exocytosis. VCS, a next generation calcineurin  
373 inhibitor, does not cause the same degree of inhibition of insulin secretion. Thus, this is a plausible  
374 physiological mechanism explaining the lower incidence of NODAT in patients taking VCS.

375

### 376 **Acknowledgments**

377 Human islets for research were provided by the Alberta Diabetes Institute IsletCore at the  
378 University of Alberta in Edmonton (<http://bcell.org/human-islets>) with the assistance of the Human  
379 Organ Procurement and Exchange (HOPE) program, Trillium Gift of Life Network (TGLN) and  
380 other Canadian organ procurement organizations. Islet isolation was approved by the Human  
381 Research Ethics Board at the University of Alberta (Pro00013094). All donors' families gave  
382 informed consent for the use of pancreatic tissue in research and we are grateful for their gift. We  
383 thank Xioake Betty Hu for technical assistance.

### 384 **Author Contributions:**

385 JK designed, conducted and analyzed experiments, and co-wrote the manuscript.

386 LB conducted and analyzed experiments and edited the manuscript.

387 PO designed, conducted and analyzed experiments, and edited the manuscript.

388 HHC designed and analyzed experiments and edited the manuscript.

389 EP designed, conducted and analyzed experiments, and edited the manuscript.

390 DRU designed, conducted and analyzed experiments, and edited the manuscript.

391 JLC designed experiments and edited the manuscript.

392 RBH designed experiments and edited the manuscript.

393 JDJ designed and analyzed experiments and co-wrote the manuscript.

394

395 **Data Availability:**

396 All data generated or analyzed during this study are included in this published article or in the

397 data repositories listed in References.

398

399

400

401

402

403

404

405

406

407

408

409

410

411

412

413



414 **References**

- 415 1. Porrini E, Moreno JM, Osuna A, Benitez R, Lampreabe I, Diaz JM, Silva I, Dominguez R,  
416 Gonzalez-Cotorruelo J, Bayes B, Lauzurica R, Ibernón M, Moreso F, Delgado P, Torres  
417 A. Prediabetes in patients receiving tacrolimus in the first year after kidney transplantation:  
418 a prospective and multicenter study. *Transplantation*. 2008;85(8):1133-1138.
- 419 2. Vincenti F, Friman S, Scheuermann E, Rostaing L, Jenssen T, Campistol JM, Uchida K,  
420 Pescovitz MD, Marchetti P, Tuncer M, Citterio F, Wiecek A, Chadban S, El-Shahawy M,  
421 Budde K, Goto N, Investigators D. Results of an international, randomized trial comparing  
422 glucose metabolism disorders and outcome with cyclosporine versus tacrolimus. *Am J*  
423 *Transplant*. 2007;7(6):1506-1514.
- 424 3. Gala-Lopez BL, Pepper AR, Pawlick RL, O'Gorman D, Kin T, Bruni A, Abualhassan N,  
425 Bral M, Bautista A, Manning Fox JE, Young LG, MacDonald PE, Shapiro AM. Antiaging  
426 Glycopeptide Protects Human Islets Against Tacrolimus-Related Injury and Facilitates  
427 Engraftment in Mice. *Diabetes*. 2016;65(2):451-462.
- 428 4. Busque S, Cantarovich M, Mulgaonkar S, Gaston R, Gaber AO, Mayo PR, Ling S,  
429 Huizinga RB, Meier-Kriesche HU, Investigators P. The PROMISE study: a phase 2b  
430 multicenter study of voclosporin (ISA247) versus tacrolimus in de novo kidney  
431 transplantation. *Am J Transplant*. 2011;11(12):2675-2684.
- 432 5. Rovin BH, Solomons N, Pendergraft WF, 3rd, Dooley MA, Tumlin J, Romero-Diaz J,  
433 Lysenko L, Navarra SV, Huizinga RB, Group A-LS. A randomized, controlled double-blind  
434 study comparing the efficacy and safety of dose-ranging voclosporin with placebo in  
435 achieving remission in patients with active lupus nephritis. *Kidney Int*. 2019;95(1):219-231.
- 436 6. Torres A, Hernandez D, Moreso F, Seron D, Burgos MD, Pallardo LM, Kanter J, Diaz  
437 Corte C, Rodriguez M, Diaz JM, Silva I, Valdes F, Fernandez-Rivera C, Osuna A, Gracia  
438 Guindo MC, Gomez Alamillo C, Ruiz JC, Marrero Miranda D, Perez-Tamajon L, Rodriguez  
439 A, Gonzalez-Rinne A, Alvarez A, Perez-Carreño E, de la Vega Prieto MJ, Henriquez F,

- 440 Gallego R, Salido E, Porrini E. Randomized Controlled Trial Assessing the Impact of  
441 Tacrolimus Versus Cyclosporine on the Incidence of Posttransplant Diabetes Mellitus.  
442 *Kidney Int Rep.* 2018;3(6):1304-1315.
- 443 7. Johnson JD, Ao Z, Ao P, Li H, Dai LJ, He Z, Tee M, Potter KJ, Klimek AM, Meloche RM,  
444 Thompson DM, Verchere CB, Warnock GL. Different effects of FK506, rapamycin, and  
445 mycophenolate mofetil on glucose-stimulated insulin release and apoptosis in human  
446 islets. *Cell Transplant.* 2009;18(8):833-845.
- 447 8. Heit JJ, Apelqvist AA, Gu X, Winslow MM, Neilson JR, Crabtree GR, Kim SK.  
448 Calcineurin/NFAT signalling regulates pancreatic beta-cell growth and function. *Nature.*  
449 2006;443(7109):345-349.
- 450 9. Goodyer WR, Gu X, Liu Y, Bottino R, Crabtree GR, Kim SK. Neonatal beta cell  
451 development in mice and humans is regulated by calcineurin/NFAT. *Dev Cell.*  
452 2012;23(1):21-34.
- 453 10. Dai C, Walker JT, Shostak A, Padgett A, Spears E, Wisniewski S, Poffenberger G,  
454 Aramandla R, Dean ED, Prasad N, Levy SE, Greiner DL, Shultz LD, Bottino R, Powers  
455 AC. Tacrolimus- and sirolimus-induced human beta cell dysfunction is reversible and  
456 preventable. *JCI Insight.* 2020;5(1).
- 457 11. Lyon J, Manning Fox JE, Spigelman AF, Kim R, Smith N, O'Gorman D, Kin T, Shapiro  
458 AM, Rajotte RV, MacDonald PE. Research-Focused Isolation of Human Islets From  
459 Donors With and Without Diabetes at the Alberta Diabetes Institute IsletCore.  
460 *Endocrinology.* 2016;157(2):560-569.
- 461 12. Batiuk TD, Pazderka F, Enns J, DeCastro L, Halloran PF. Cyclosporine inhibition of  
462 calcineurin activity in human leukocytes in vivo is rapidly reversible. *J Clin Invest.*  
463 1995;96(3):1254-1260.

- 464 13. Kuo J, Bobardt M, Chatterji U, Mayo PR, Trepanier DJ, Foster RT, Gallay P, Ure DR. A  
465 Pan-Cyclophilin Inhibitor, CRV431, Decreases Fibrosis and Tumor Development in  
466 Chronic Liver Disease Models. *J Pharmacol Exp Ther.* 2019;371(2):231-241.
- 467 14. Rezania A, Bruin JE, Arora P, Rubin A, Batushansky I, Asadi A, O'Dwyer S, Quiskamp N,  
468 Mojibian M, Albrecht T, Yang YH, Johnson JD, Kieffer TJ. Reversal of diabetes with  
469 insulin-producing cells derived in vitro from human pluripotent stem cells. *Nat Biotechnol.*  
470 2014;32(11):1121-1133.
- 471 15. Yang YH, Szabat M, Bragagnini C, Kott K, Helgason CD, Hoffman BG, Johnson JD.  
472 Paracrine signalling loops in adult human and mouse pancreatic islets: netrins modulate  
473 beta cell apoptosis signalling via dependence receptors. *Diabetologia.* 2011;54(4):828-  
474 842.
- 475 16. Alejandro EU, Lim GE, Mehran AE, Hu X, Taghizadeh F, Pelipeychenko D, Baccarini M,  
476 Johnson JD. Pancreatic beta-cell Raf-1 is required for glucose tolerance, insulin secretion,  
477 and insulin 2 transcription. *Faseb J.* 2011;25(11):3884-3895.
- 478 17. Jeffrey KD, Alejandro EU, Luciani DS, Kalynyak TB, Hu X, Li H, Lin Y, Townsend RR,  
479 Polonsky KS, Johnson JD. Carboxypeptidase E mediates palmitate-induced beta-cell ER  
480 stress and apoptosis. *Proc Natl Acad Sci U S A.* 2008;105(24):8452-8457.
- 481 18. Dror V, Kalynyak TB, Bychkivska Y, Frey MH, Tee M, Jeffrey KD, Nguyen V, Luciani DS,  
482 Johnson JD. Glucose and endoplasmic reticulum calcium channels regulate HIF-1beta via  
483 presenilin in pancreatic beta-cells. *J Biol Chem.* 2008;283(15):9909-9916.
- 484 19. Luciani DS, Johnson JD. Acute effects of insulin on beta-cells from transplantable human  
485 islets. *Molecular and Cellular Endocrinology.* 2005;241(1-2):88-98.
- 486 20. Yang YH, Wills QF, Johnson JD. A live-cell, high-content imaging survey of 206  
487 endogenous factors across five stress conditions reveals context-dependent survival  
488 effects in mouse primary beta cells. *Diabetologia.* 2015;58(6):1239-1249.

- 489 21. Yang YH, Vilin YY, Roberge M, Kurata HT, Johnson JD. Multiparameter Screening  
490 Reveals a Role for Na(+) Channels in Cytokine-Induced beta-Cell Death. *Molecular*  
491 *endocrinology*. 2014;28(3):406-417.
- 492 22. Yang YH, Manning Fox JE, Zhang KL, MacDonald PE, Johnson JD. Intra-islet SLIT-ROBO  
493 signaling is required for beta-cell survival and potentiates insulin secretion. *Proc Natl Acad*  
494 *Sci U S A*. 2013;110(41):16480-16485.
- 495 23. Yang YH, Johnson JD. Multi-parameter single-cell kinetic analysis reveals multiple modes  
496 of cell death in primary pancreatic beta-cells. *J Cell Sci*. 2013;126(Pt 18):4286-4295.
- 497 24. Dumont FJ. FK506, an immunosuppressant targeting calcineurin function. *Curr Med*  
498 *Chem*. 2000;7(7):731-748.
- 499 25. Sieber M, Baumgrass R. Novel inhibitors of the calcineurin/NFATc hub - alternatives to  
500 CsA and FK506? *Cell Commun Signal*. 2009;7:25.
- 501 26. Braun M, Ramracheya R, Johnson PR, Rorsman P. Exocytotic properties of human  
502 pancreatic beta-cells. *Ann N Y Acad Sci*. 2009;1152:187-193.
- 503 27. Xu C, Niu YJ, Liu XJ, Teng YQ, Li CF, Wang HY, Yin JP, Wang LT, Shen ZY. Tacrolimus  
504 reversibly reduces insulin secretion, induces insulin resistance, and causes islet cell  
505 damage in rats. *Int J Clin Pharmacol Ther*. 2014;52(7):620-627.
- 506 28. Ozbay LA, Smidt K, Mortensen DM, Carstens J, Jorgensen KA, Rungby J. Cyclosporin  
507 and tacrolimus impair insulin secretion and transcriptional regulation in INS-1E beta-cells.  
508 *Br J Pharmacol*. 2011;162(1):136-146.
- 509 29. Radu RG, Fujimoto S, Mukai E, Takehiro M, Shimono D, Nabe K, Shimodahira M,  
510 Kominato R, Aramaki Y, Nishi Y, Funakoshi S, Yamada Y, Seino Y. Tacrolimus  
511 suppresses glucose-induced insulin release from pancreatic islets by reducing  
512 glucokinase activity. *Am J Physiol Endocrinol Metab*. 2005;288(2):E365-371.

- 513 30. Paty BW, Harmon JS, Marsh CL, Robertson RP. Inhibitory effects of immunosuppressive  
514 drugs on insulin secretion from HIT-T15 cells and Wistar rat islets. *Transplantation*.  
515 2002;73(3):353-357.
- 516 31. Redmon JB, Olson LK, Armstrong MB, Greene MJ, Robertson RP. Effects of tacrolimus  
517 (FK506) on human insulin gene expression, insulin mRNA levels, and insulin secretion in  
518 HIT-T15 cells. *J Clin Invest*. 1996;98(12):2786-2793.
- 519 32. Ishizuka J, Gugliuzza KK, Wassmuth Z, Hsieh J, Sato K, Tsuchiya T, Townsend CM, Jr.,  
520 Fish JC, Thompson JC. Effects of FK506 and cyclosporine on dynamic insulin secretion  
521 from isolated dog pancreatic islets. *Transplantation*. 1993;56(6):1486-1490.
- 522 33. Wakugami T, Islam MR, Higa S, Murakami K, Mimura G. Effect of FK506 on the  
523 development of diabetes in BB rats in comparison with that of cyclosporin. *Tohoku J Exp*  
524 *Med*. 1993;169(1):21-29.
- 525 34. Herold KC, Nagamatsu S, Buse JB, Kulsakdinun P, Steiner DF. Inhibition of glucose-  
526 stimulated insulin release from beta TC3 cells and rodent islets by an analog of FK506.  
527 *Transplantation*. 1993;55(1):186-192.
- 528 35. Carroll PB, Goncalves AA, Boschero AC, Tzakis AG, Starzl TE, Atwater I. Effect of the  
529 immunosuppressant FK 506 on insulin release from adult rat islets of Langerhans.  
530 *Transplant Proc*. 1991;23(1 Pt 1):337-339.
- 531 36. Rostambeigi N, Lanza IR, Dzeja PP, Deeds MC, Irving BA, Reddi HV, Madde P, Zhang  
532 S, Asmann YW, Anderson JM, Schimke JM, Nair KS, Eberhardt NL, Kudva YC. Unique  
533 cellular and mitochondrial defects mediate FK506-induced islet beta-cell dysfunction.  
534 *Transplantation*. 2011;91(6):615-623.
- 535 37. Hernandez-Fisac I, Pizarro-Delgado J, Calle C, Marques M, Sanchez A, Barrientos A,  
536 Tamarit-Rodriguez J. Tacrolimus-induced diabetes in rats courses with suppressed insulin  
537 gene expression in pancreatic islets. *Am J Transplant*. 2007;7(11):2455-2462.

- 538 38. Uchizono Y, Iwase M, Nakamura U, Sasaki N, Goto D, Iida M. Tacrolimus impairment of  
539 insulin secretion in isolated rat islets occurs at multiple distal sites in stimulus-secretion  
540 coupling. *Endocrinology*. 2004;145(5):2264-2272.
- 541 39. Kloster-Jensen K, Sahraoui A, Vethe NT, Korsgren O, Bergan S, Foss A, Scholz H.  
542 Treatment with Tacrolimus and Sirolimus Reveals No Additional Adverse Effects on  
543 Human Islets In Vitro Compared to Each Drug Alone but They Are Reduced by Adding  
544 Glucocorticoids. *J Diabetes Res*. 2016;2016:4196460.
- 545 40. Soleimanpour SA, Crutchlow MF, Ferrari AM, Raum JC, Groff DN, Rankin MM, Liu C, De  
546 Leon DD, Naji A, Kushner JA, Stoffers DA. Calcineurin signaling regulates human islet  
547  $\beta$ -cell survival. *J Biol Chem*. 2010;285(51):40050-40059.
- 548 41. Bugliani M, Masini M, Liechti R, Marselli L, Xenarios I, Boggi U, Filipponi F, Masiello P,  
549 Marchetti P. The direct effects of tacrolimus and cyclosporin A on isolated human islets:  
550 A functional, survival and gene expression study. *Islets*. 2009;1(2):106-110.
- 551 42. Polastri L, Galbiati F, Bertuzzi F, Fiorina P, Nano R, Gregori S, Aldrighetti L, Pozza G,  
552 Secchi A, Adorini L, Davalli AM. Secretory defects induced by immunosuppressive agents  
553 on human pancreatic beta-cells. *Acta Diabetol*. 2002;39(4):229-233.
- 554 43. Ricordi C, Zeng Y, Alejandro R, Tzakis A, Carroll P, Rilo HL, Venkataramanan R, Fung  
555 JJ, Bereiter D, Starzl TE. Effect of FK 506 on human pancreatic islets following renal  
556 subcapsular transplantation in diabetic nude mice. *Transplant Proc*. 1992;24(3):1042.
- 557 44. Ricordi C, Zeng YJ, Alejandro R, Tzakis A, Venkataramanan R, Fung J, Bereiter D, Mintz  
558 DH, Starzl TE. In vivo effect of FK506 on human pancreatic islets. *Transplantation*.  
559 1991;52(3):519-522.
- 560 45. Tze WJ, Tai J, Cheung S. In vitro effects of FK-506 on human and rat islets.  
561 *Transplantation*. 1990;49(6):1172-1174.
- 562 46. Trinanes J, Ten Dijke P, Groen N, Hanegraaf M, Porrini E, Rodriguez-Rodriguez AE,  
563 Drachenberg C, Rabelink TJ, de Koning E, Carlotti F, de Vries APJ. Tacrolimus-Induced

- 564 BMP/SMAD Signaling Associates With Metabolic Stress-Activated FOXO1 to Trigger  
565 beta-Cell Failure. *Diabetes*. 2020;69(2):193-204.
- 566 47. Hall E, Dekker Nitert M, Volkov P, Malmgren S, Mulder H, Bacos K, Ling C. The effects of  
567 high glucose exposure on global gene expression and DNA methylation in human  
568 pancreatic islets. *Mol Cell Endocrinol*. 2018;472:57-67.
- 569 48. Perelis M, Marcheiva B, Ramsey KM, Schipma MJ, Hutchison AL, Taguchi A, Peek CB,  
570 Hong H, Huang W, Omura C, Allred AL, Bradfield CA, Dinner AR, Barish GD, Bass J.  
571 Pancreatic beta cell enhancers regulate rhythmic transcription of genes controlling insulin  
572 secretion. *Science*. 2015;350(6261):aac4250.
- 573 49. Andersson SA, Olsson AH, Esguerra JL, Heimann E, Ladenvall C, Edlund A, Salehi A,  
574 Taneera J, Degerman E, Groop L, Ling C, Eliasson L. Reduced insulin secretion correlates  
575 with decreased expression of exocytotic genes in pancreatic islets from patients with type  
576 2 diabetes. *Mol Cell Endocrinol*. 2012;364(1-2):36-45.
- 577 50. Regazzi R, Ravazzola M, Iezzi M, Lang J, Zahraoui A, Anderegg E, Morel P, Takai Y,  
578 Wollheim CB. Expression, localization and functional role of small GTPases of the Rab3  
579 family in insulin-secreting cells. *J Cell Sci*. 1996;109 ( Pt 9):2265-2273.
- 580 51. Bernal-Mizrachi E, Fatrai S, Johnson JD, Ohsugi M, Otani K, Han Z, Polonsky KS, Permutt  
581 MA. Defective insulin secretion and increased susceptibility to experimental diabetes are  
582 induced by reduced Akt activity in pancreatic islet beta cells. *J Clin Invest*.  
583 2004;114(7):928-936.
- 584 52. Blanchet E, Van de Velde S, Matsumura S, Hao E, LeLay J, Kaestner K, Montminy M.  
585 Feedback inhibition of CREB signaling promotes beta cell dysfunction in insulin  
586 resistance. *Cell Rep*. 2015;10(7):1149-1157.
- 587 53. Oetjen E, Thoms KM, Laufer Y, Pape D, Blume R, Li P, Knepel W. The  
588 immunosuppressive drugs cyclosporin A and tacrolimus inhibit membrane depolarization-

- 589 induced CREB transcriptional activity at the coactivator level. *Br J Pharmacol.*  
590 2005;144(7):982-993.
- 591 54. Hughes JW, Cho JH, Conway HE, DiGrucchio MR, Ng XW, Roseman HF, Abreu D, Urano  
592 F, Piston DW. Primary cilia control glucose homeostasis via islet paracrine interactions.  
593 *Proc Natl Acad Sci U S A.* 2020;117(16):8912-8923.
- 594 55. Li X, Chan LWC, Li X, Liu C, Yang G, Gao J, Dai M, Wang Y, Xie Z, Liu J, Zhou F, Zheng  
595 T, Feng D, Guo S, Li H, Sun K, Yang S. Obesity-Induced Regulator of Calcineurin 1  
596 Overexpression Leads to beta-Cell Failure Through Mitophagy Pathway Inhibition.  
597 *Antioxid Redox Signal.* 2020;32(7):413-428.
- 598 56. Zhao J, Zong W, Zhao Y, Gou D, Liang S, Shen J, Wu Y, Zheng X, Wu R, Wang X, Niu  
599 F, Wang A, Zhang Y, Xiong JW, Chen L, Liu Y. In vivo imaging of beta-cell function reveals  
600 glucose-mediated heterogeneity of beta-cell functional development. *Elife.* 2019;8.
- 601 57. Alejandro EU, Kalynyak TB, Taghizadeh F, Gwiazda KS, Rawstron EK, Jacob KJ,  
602 Johnson JD. Acute insulin signaling in pancreatic beta-cells is mediated by multiple Raf-1  
603 dependent pathways. *Endocrinology.* 2010;151(2):502-512.
- 604 58. Bernal-Mizrachi E, Cras-Meneur C, Ye BR, Johnson JD, Permutt MA. Transgenic  
605 overexpression of active calcineurin in beta-cells results in decreased beta-cell mass and  
606 hyperglycemia. *PLoS One.* 2010;5(8):e11969.
- 607 59. Wang R, McGrath BC, Kopp RF, Roe MW, Tang X, Chen G, Cavener DR. Insulin secretion  
608 and Ca<sup>2+</sup> dynamics in beta-cells are regulated by PERK (EIF2AK3) in concert with  
609 calcineurin. *J Biol Chem.* 2013;288(47):33824-33836.
- 610 60. Renstrom E, Ding WG, Bokvist K, Rorsman P. Neurotransmitter-induced inhibition of  
611 exocytosis in insulin-secreting beta cells by activation of calcineurin. *Neuron.*  
612 1996;17(3):513-522.



613 61. Braun M, Wendt A, Buschard K, Salehi A, Sewing S, Gromada J, Rorsman P. GABAB  
614 receptor activation inhibits exocytosis in rat pancreatic beta-cells by G-protein-dependent  
615 activation of calcineurin. *J Physiol.* 2004;559(Pt 2):397-409.

616

617

618

619

620

621

622

623

624

625

626

627

628

629

630

631

632

633

634

635

636

637

638

639 **Figure Legends**

640

641 **Figure 1| Experimental design, and human islet donor and isolation characteristics (A)**

642 Experimental design for study of VCS and TAC effects on high quality primary human islets  
643 isolated from cadaveric donors. Details of each isolation are available from IsletCore.ca (the  
644 example image shown from the R297 isolation). **(B)** High-quality, research-specific human islets  
645 from consenting donors were obtained from IsletCore Laboratory in Edmonton, Alberta. Islet  
646 donors and isolation characteristics are listed here. Stimulation index is the average of 3 technical  
647 replicates of the 16.7 mM to 2.8 mM glucose response as provided by the IsletCore Laboratory  
648 quality control database.

649

650 **Figure 2| Differences between TAC, VCS and CsA on calcineurin activity, lymphocyte**

651 **proliferation assay, and NFAT accumulation. (A-D)** Sister aliquots of PBMC were treated in  
652 the presence of drug or vehicle control for analysis of lymphocyte cell division (Div), calcineurin  
653 activity (CN), and cytosolic NFAT. **(A)** Lymphocyte division was determined by CFSE analysis  
654 following 3-day stimulation with CD3 antibody. Calcineurin activity was determined by radioactive  
655 <sup>32</sup>P-RII peptide assay following 30-min stimulation with PMA+A23187. **(B)** Cytosolic NFAT  
656 relative to CypA (loading control protein) was determined by Western blotting and densitometric  
657 quantitation following 30-min stimulation with PMA+A23187. **(C)** K562 cells stably transfected with  
658 an NFAT-luciferase reporter were stimulated for 22 hr with PMA + A23187 in the presence of drug  
659 or vehicle control. Cells were separated into separate aliquots for measurement of calcineurin  
660 activity and luciferase activity for NFAT promoter activation. **(D)** Percent inhibition was determined  
661 by normalizing values to vehicle control (100% activity) and to 2 µg/ml VCS (100% inhibition).  
662 These observations were replicated 5 times. **(E)** Calculated IC50 values in PBMC and K562-  
663 NFAT-Luc. n = 8-12 experiments for PBMC and 4-7 experiments for K562-NFAT-Luc.

664

665 **Figure 3| Basal, glucose-stimulated and KCl-stimulated insulin secretion from human**  
666 **islets treated with peak and trough concentrations of VCS and TAC. (A)** Averaged traces of  
667 dynamic insulin secretion measurements in the context of 3 mM glucose, 15 mM glucose, or 30  
668 mM KCl (as indicated). **(B)** Total area under the curve (AUC) of the 15 mM glucose response. **(C,**  
669 **D, E)** AUCs of 1<sup>st</sup> phase and 2<sup>nd</sup> phase 15 mM glucose responses, as well as the KCl response.  
670 **(F)** Baseline insulin secretion. **(G, H)** Insulin secretion normalized to baseline, including AUC.  
671 n=17

672

673 **Figure 4| Insulin content from isolated human islets treated with VCS and TAC.** Insulin  
674 protein measured by radioimmunoassay from 20 islets treated for 48 hours with VCS or TAC  
675 (concentrations as indicate) after acid-ethanol extraction of insulin.

676

677 **Figure 5| Islet cell survival from dispersed human islets treated with VCS and TAC. (A,B)**  
678 Cell death was assessed every 30 minutes over 48 hours using Propidium Iodide (PI) and Hoechst  
679 staining, with a significant increase seen in the presence of a  $\beta$ -cell toxic cytokine cocktail. **(C)**  
680 Shown is the maximum cell death normalized measurement (see methods) for each condition  
681 TAC and VCS dose, normalized to the DMSO control cultures. Results shown are quantified from  
682 5 cultures per drug condition, over two separate runs.

683

684 **Figure 6| RNA sequencing analysis and protein-protein interaction networks of human**  
685 **islets treated with TAC and VCS at peak doses. (A)** mRNAs that were nominally differentially  
686 expressed (adjusted  $p < 0.05$ ) are shown **(B)** Protein-protein interaction networks highlight  
687 connections between calcineurin/NFAT pathway and deferentially expression genes in **(A)** VCS  
688 or **(B)** TAC treatment. Up or down regulated genes are shown in red or green, respectively.

689

690 **Figure 7| Working model of differential regulation of insulin exocytosis by VCS and TAC.**

691 In our model, TAC has more potent inhibitory effects on NFAT, and therefore results in the  
692 stronger suppression of key genes. TAC-sensitive gene products with known functions related to  
693 insulin secretion are shown in orange.

# Figure 1

Overall study design and human islet donor characteristics

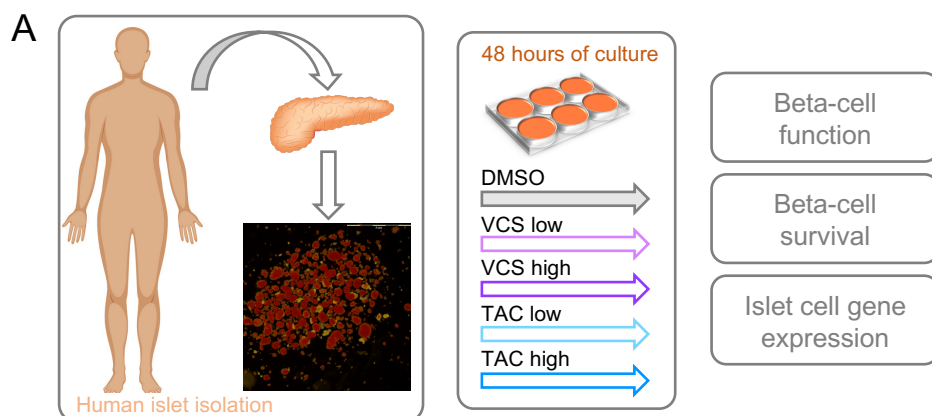

**B**

| Donor ID | Age (years) | Sex    | HbA1c (%) | BMI  | Islet Purity | Stimulation Index | Experiments        |
|----------|-------------|--------|-----------|------|--------------|-------------------|--------------------|
| R297     | 69          | Male   | No data   | 27.2 | 90%          | 5.05              | Perifusion         |
| R300     | 30          | Female | No data   | 25.3 | 75%          | 2.05              | Perifusion         |
| R301     | 18          | Male   | 5.0       | 19.0 | 75%          | 9.21              | Perifusion         |
| R302     | 62          | Female | 6.2       | 32.3 | 40%          | 3.57              | RNAseq             |
| R303     | 56          | Female | No data   | 24.1 | 85%          | 2.64              | Perifusion         |
| R305     | 60          | Male   | 5.6       | 21.0 | 80%          | 1.29              | Perifusion, RNAseq |
| R306     | 22          | Female | 5.3       | 21.1 | 80%          | 19.13             | Perifusion         |
| R308     | 20          | Male   | 5.5       | 19.8 | 80%          | 5.90              | Perifusion         |
| R309     | 47          | Female | 5.5       | 27.4 | 80%          | 9.08              | Perifusion, RNAseq |
| R310     | 25          | Male   | 5.4       | 26.4 | 90%          | 3.81              | Perifusion, RNAseq |
| R314     | 31          | Female | 5.0       | 30.3 | 80%          | 6.53              | Perifusion, RNAseq |
| R316     | 52          | Male   | 5.7       | 26.0 | 50%          | 6.93              | Perifusion, RNAseq |
| R317     | 54          | Male   | 5.1       | 26.4 | 90%          | 10.78             | RNAseq             |
| R318     | 54          | Male   | 5.0       | 20.5 | 90%          | 2.76              | Perifusion         |
| R319     | 68          | Male   | 5.0       | 27.8 | 90%          | 5.04              | Perifusion         |
| R322     | 44          | Female | 4.9       | 23.2 | 90%          | 3.09              | Perifusion         |
| R325     | 50          | Male   | No data   | 30.3 | 75%          | 2.86              | Perifusion         |
| R326     | 26          | Male   | 5.5       | 27.0 | 90%          | 5.34              | Perifusion         |
| R327     | 57          | Male   | 5.8       | 33.9 | 95%          | 3.59              | Perifusion         |
| R335     | 25          | Male   | 4.9       | 24.6 | 80%          | 11.92             | Cell death         |
| R338     | 30          | Male   | 5.3       | 25.5 | 90%          | 6.73              | Cell death         |

# Figure 2

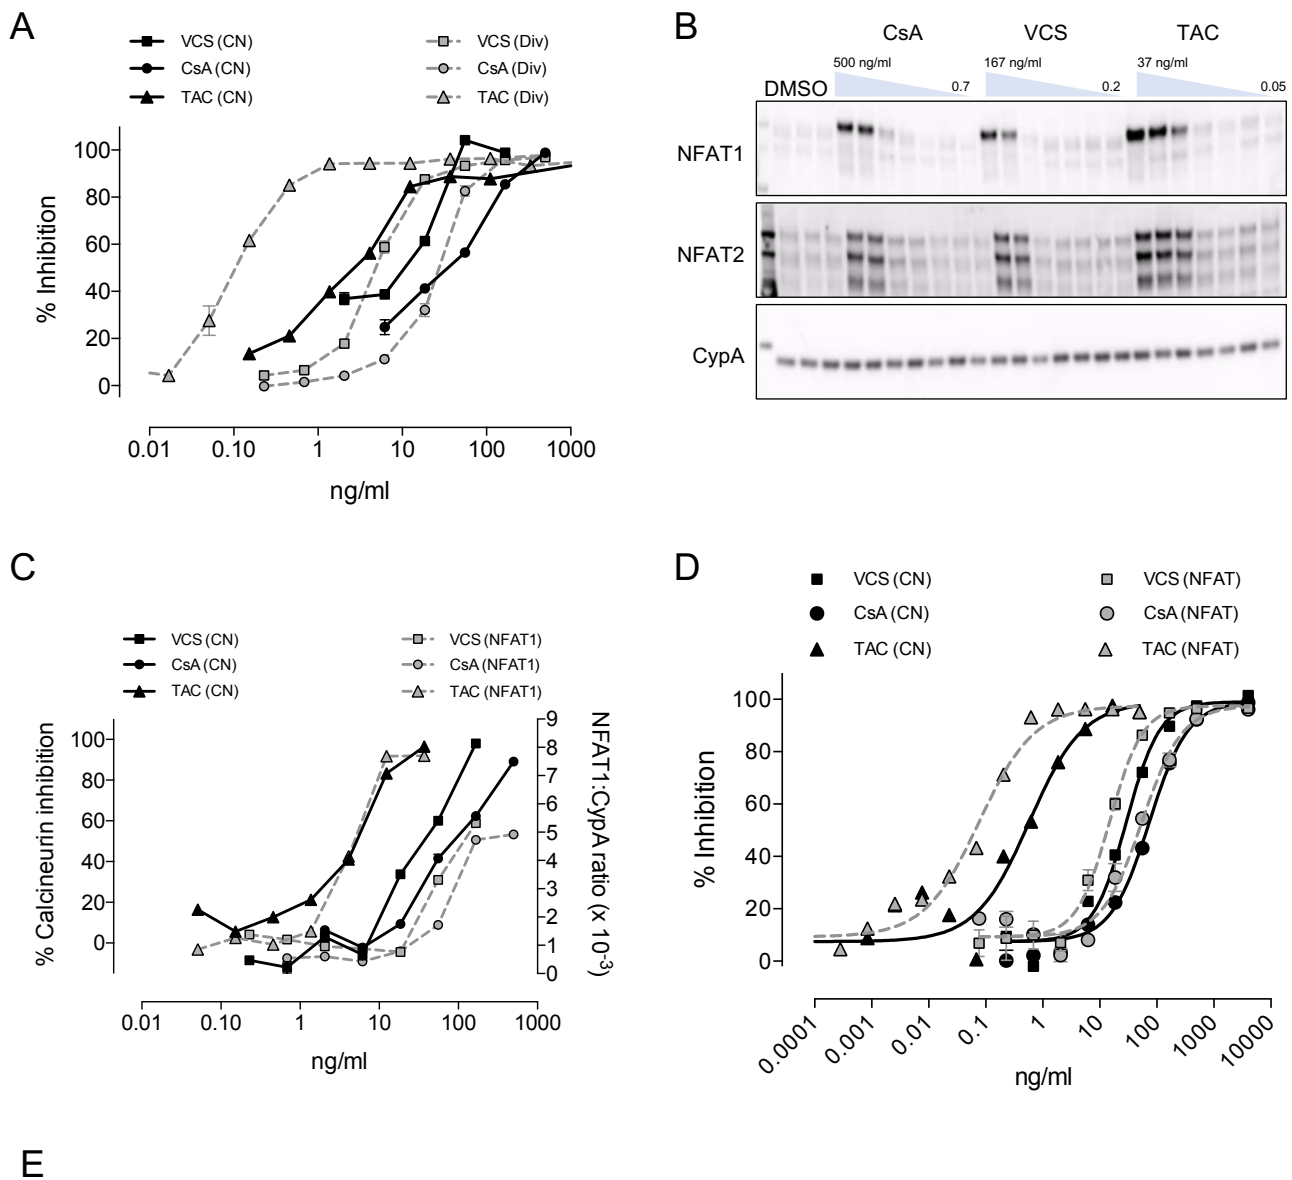

# Figure 3

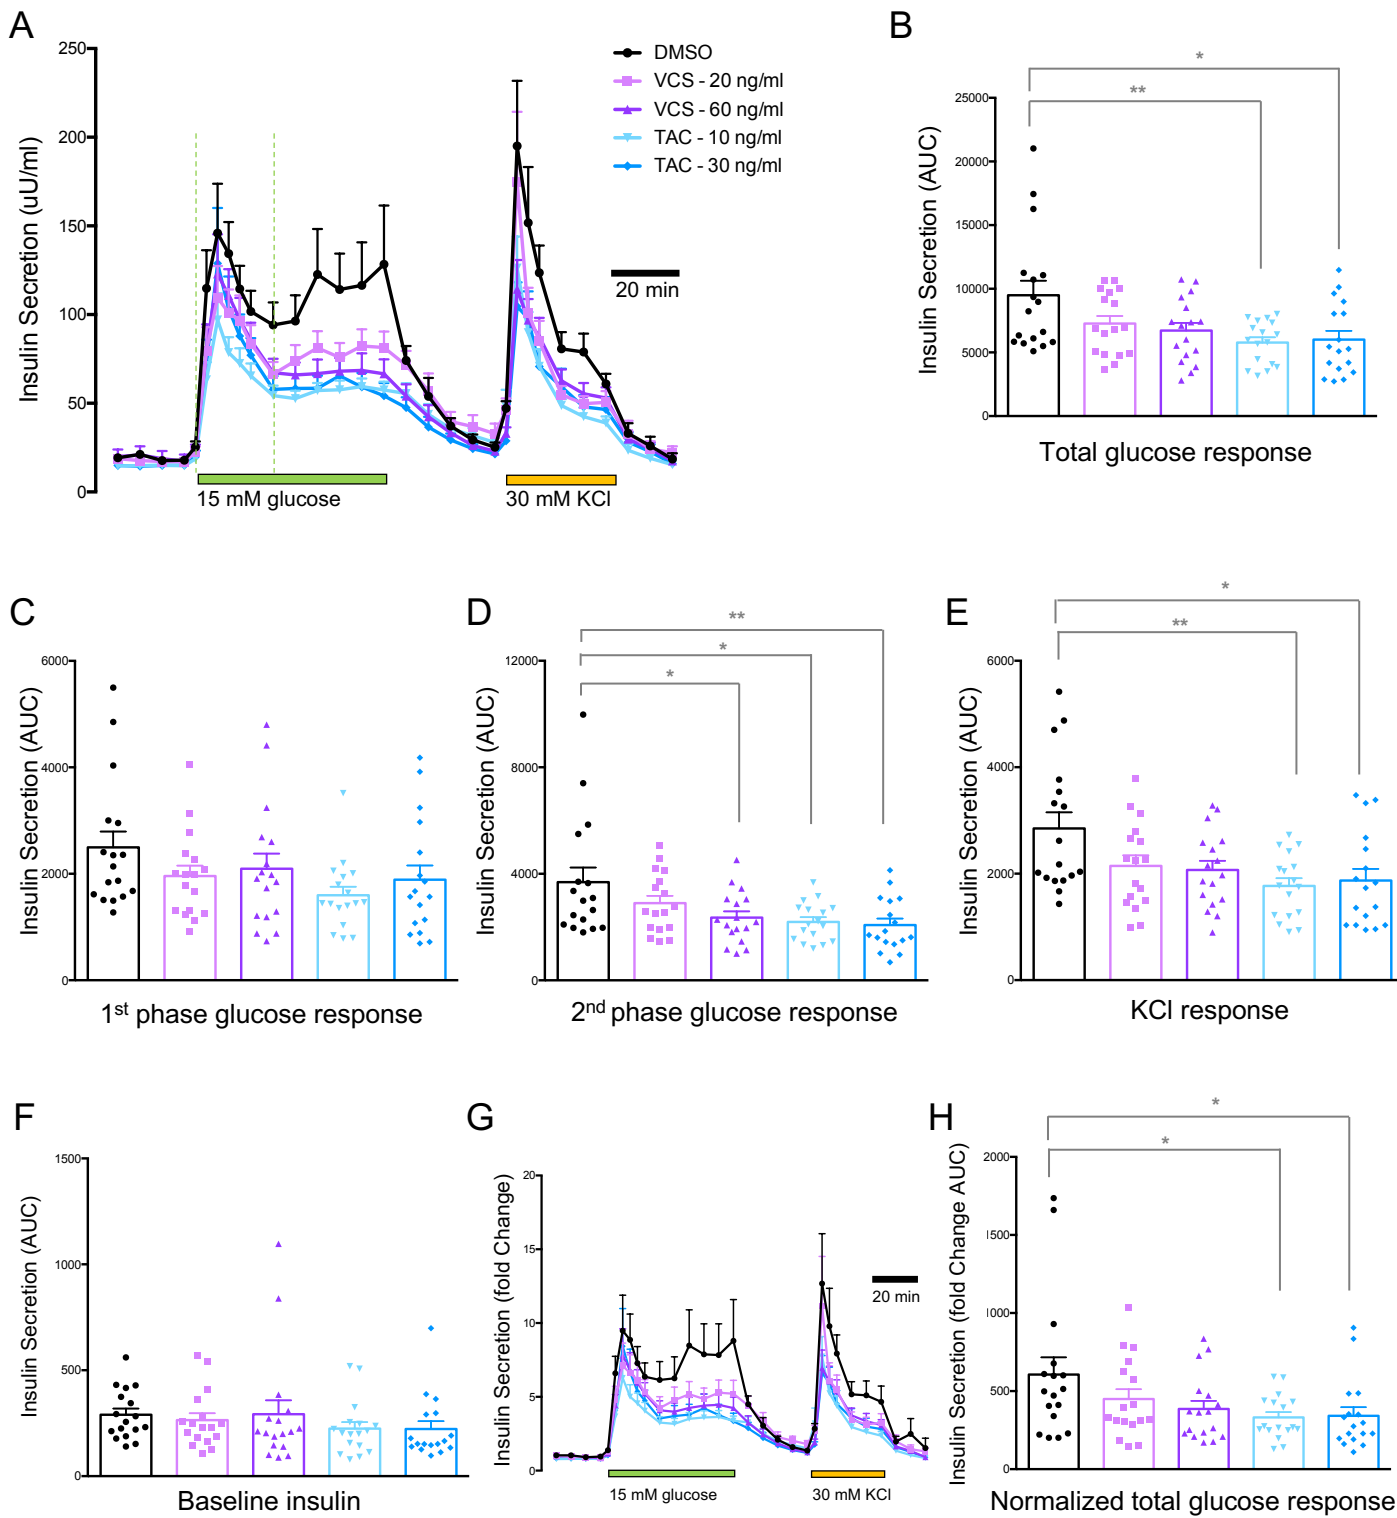

Figure 4

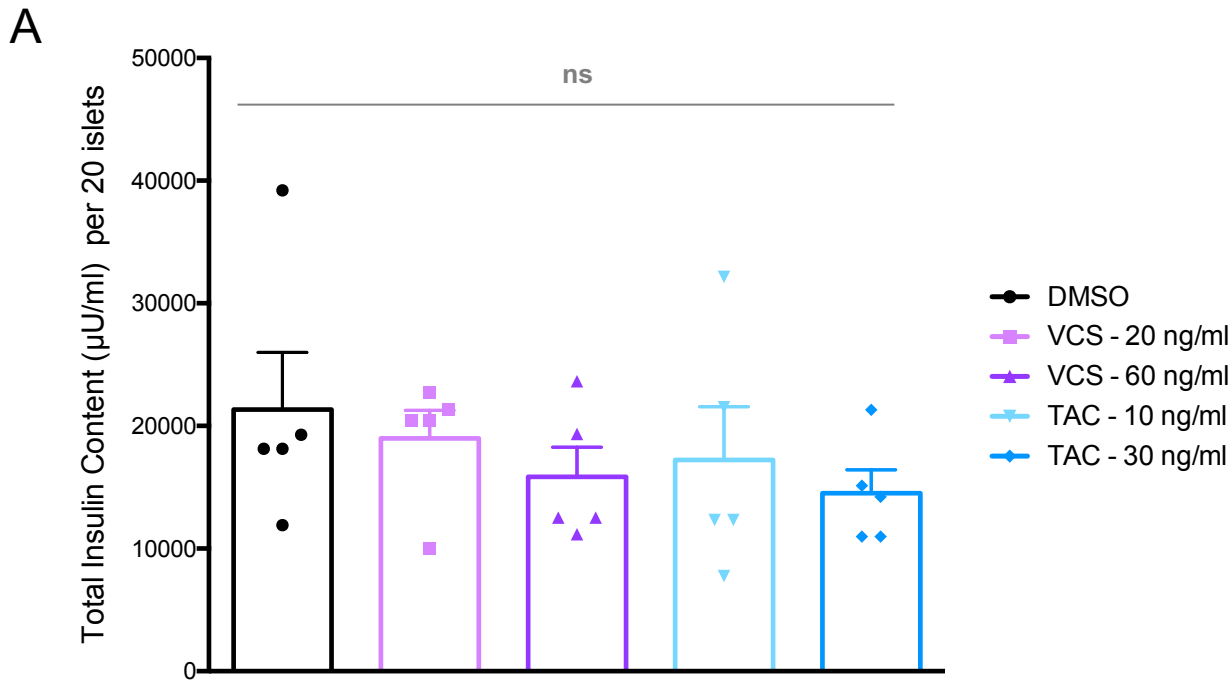



Figure 5

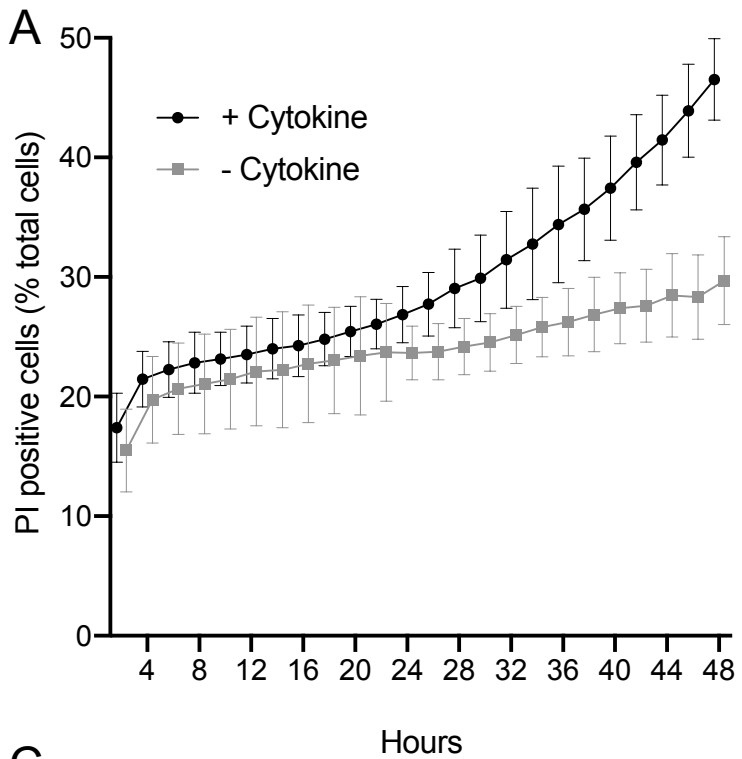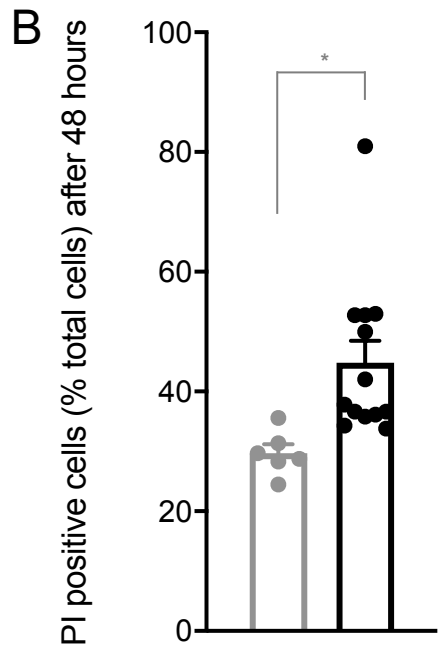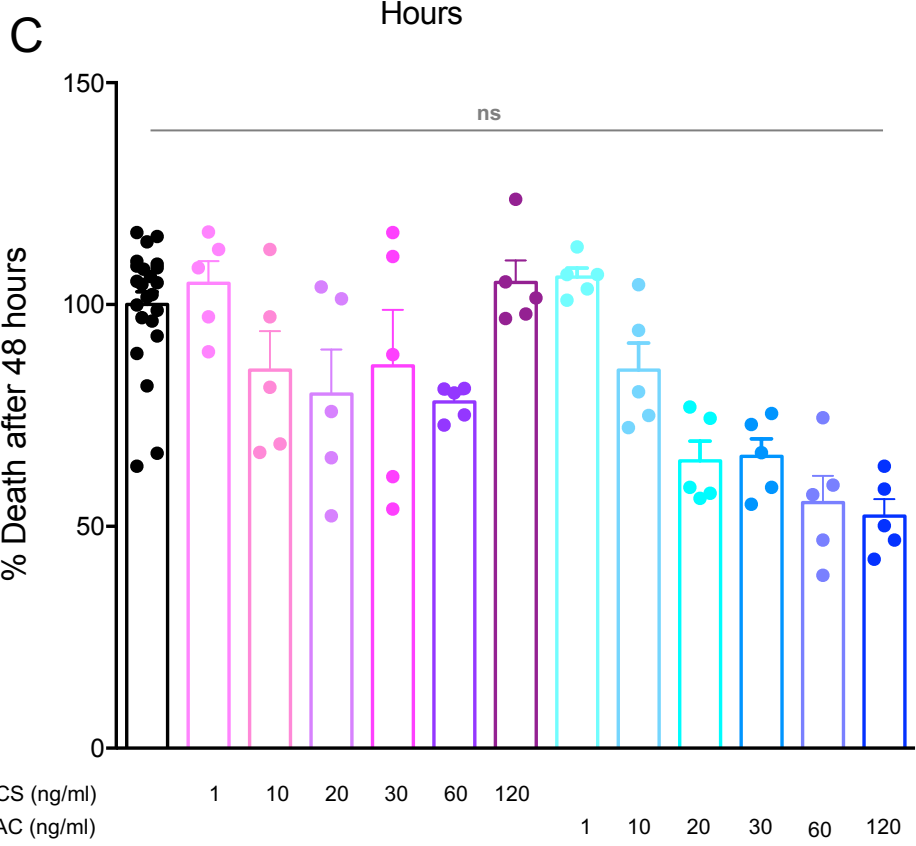

Figure 6

A

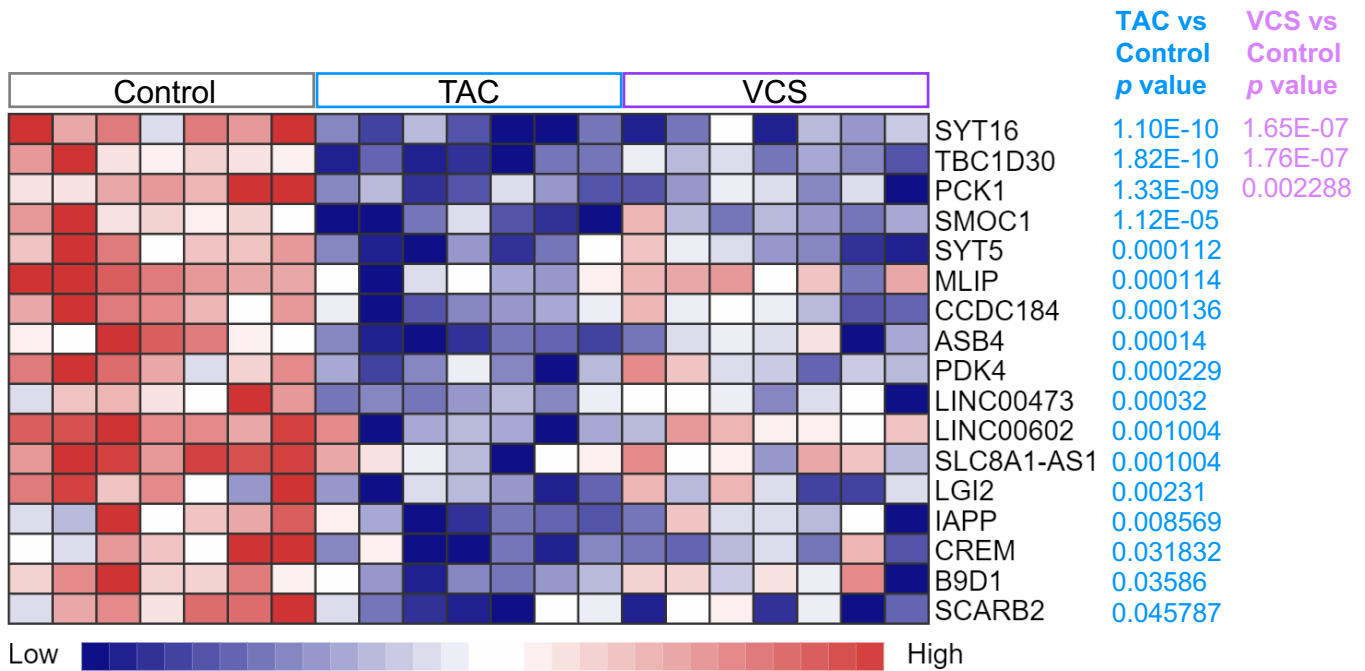

B

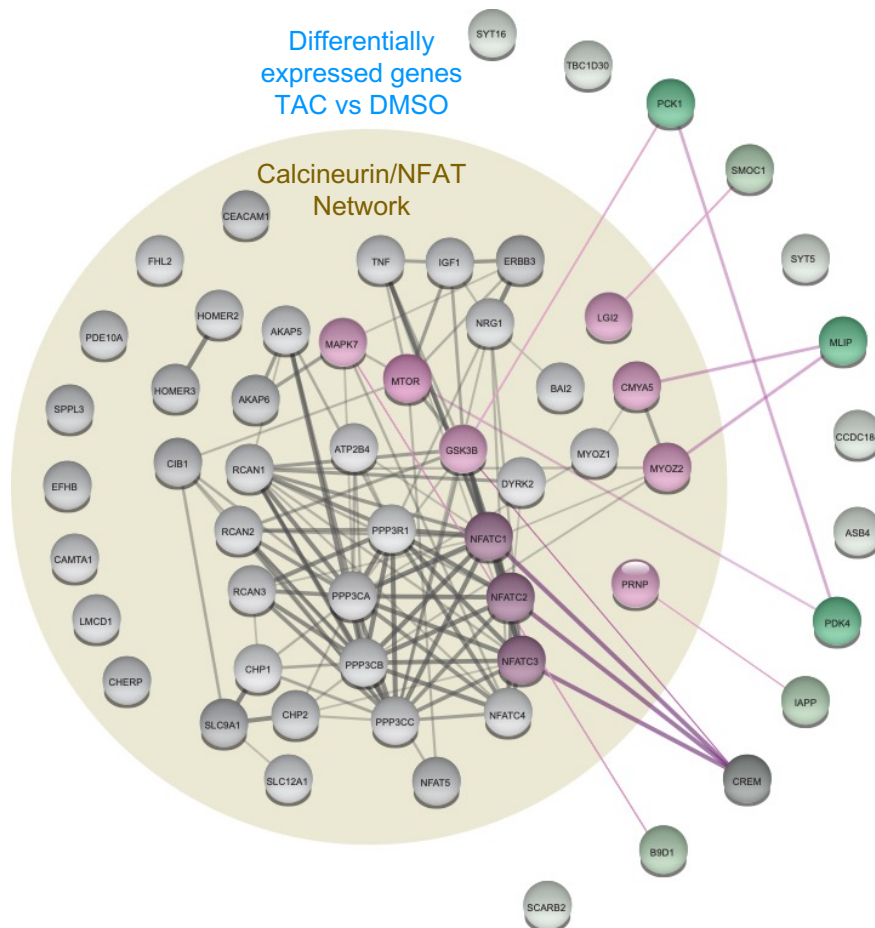

Figure 7

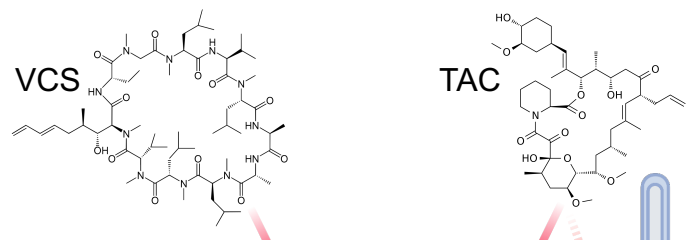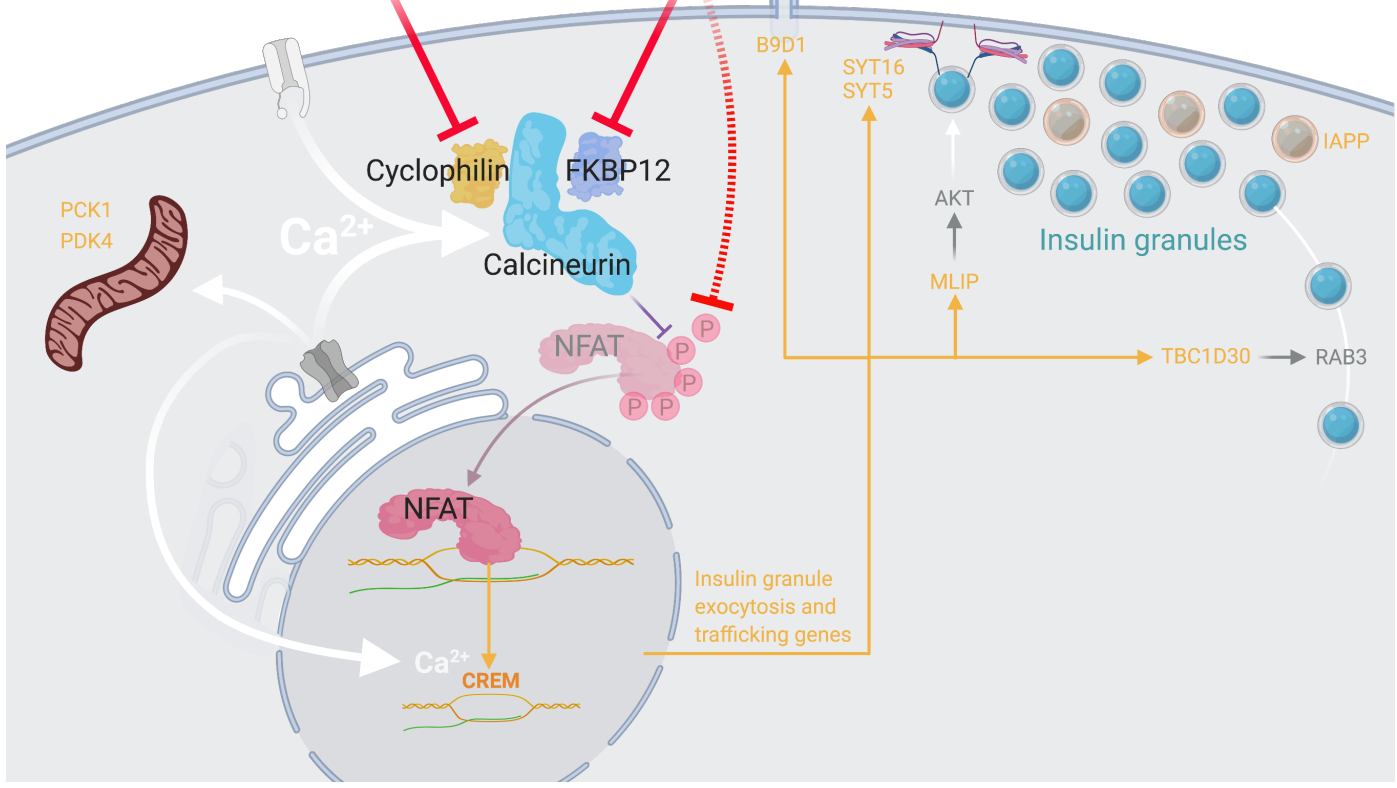

Source: https://www.biorxiv.org/content/10.1101/2020.04.30.071324v2.full.pdf
